# Supplementary material for: In situ efficient growth of Rubik nanocube WO3·0.33H2O array films for high-performance electrochromic energy storage devices
Source: Royal Society of Chemistry journal article supplement (doi:10.1039/d3tc04207c), 2024-01-01
Supplement: d3tc04207c1.pdf [file d3tc04207c1.pdf]

## Supplementary Information

### **In-situ efficient growth of Rubik nanocube $\text{WO}_3 \cdot 0.33\text{H}_2\text{O}$ array films for high-performance electrochromic energy storage device**

Sensen Jia, Pengyang Lei, Zhuanpei Wang, Weilong Yang, Jinhui Wang,\*

Guofa Cai\*

*Key Laboratory for Special Functional Materials of Ministry of Education, National & Local Joint  
Engineering Research Center for High-efficiency Display and Lighting Technology, School of  
Materials and Engineering, and Collaborative Innovation Center of Nano Functional Materials  
and Applications, Henan University, Kaifeng 475004, China*

\*Corresponding author(s). E-mail: [jinhui.wang@henu.edu.cn](mailto:jinhui.wang@henu.edu.cn); [caiguofa@henu.edu.cn](mailto:caiguofa@henu.edu.cn)

### Proof of the Faraday reaction process

According to the following power law: <sup>1</sup>

$$i = av^b \quad (1)$$

Where  $i$  is the peak current and  $v$  is the scan rate, and  $a$  and  $b$  refer to the adjustable parameters.

### Calculation of areal specific capacitance (Ca)

The  $C_a$  can be calculated at different current densities from the GCD curves according to the following equation: <sup>2</sup>

$$C_a = \frac{2I \int_{t(V_{max})}^{t(V_{min})} V(t) dt}{A(V_{max} - V_{min})^2} \quad (2)$$

Where  $C_a$  and  $A$  represent the areal capacitance and geometrical area of the electrode involved in the reaction in the electrolyte,  $V_{max}$  and  $V_{min}$  are the maximum and minimum potential during galvanostatic discharge measurements, respectively.  $I$  is the current density of charge/discharge.

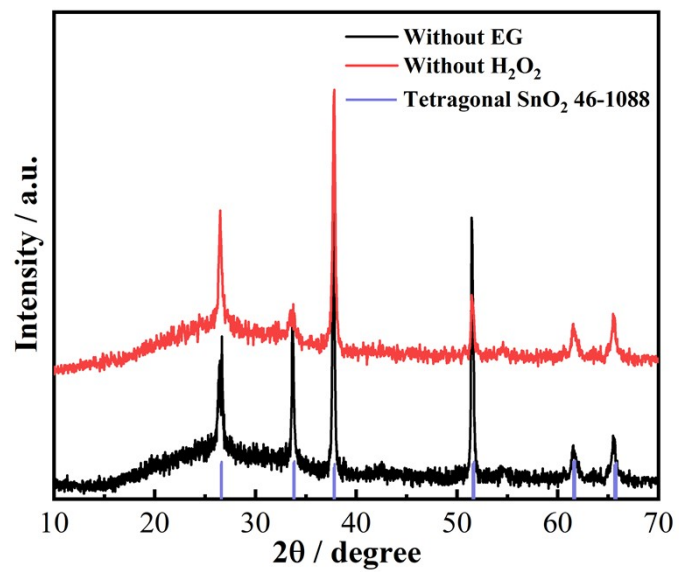

**Fig. S1.** XRD patterns of the growth of  $\text{WO}_3$  film without  $\text{H}_2\text{O}_2$  and EG on FTO substrates.

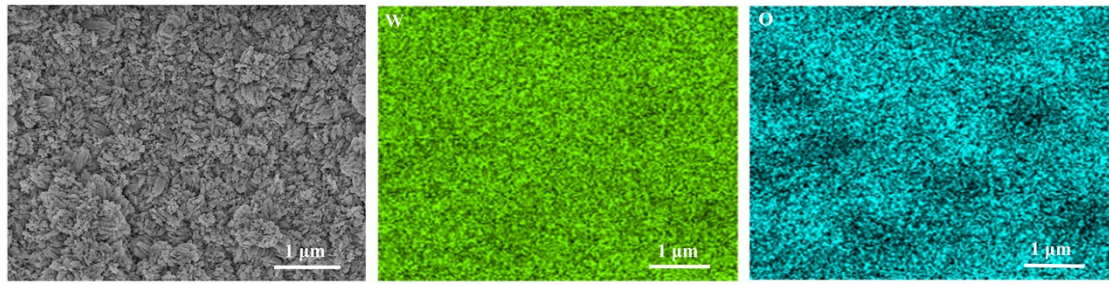

**Fig. S2.** SEM and EDS mapping images of  $\text{WO}_3 \cdot 0.33\text{H}_2\text{O}$  film.

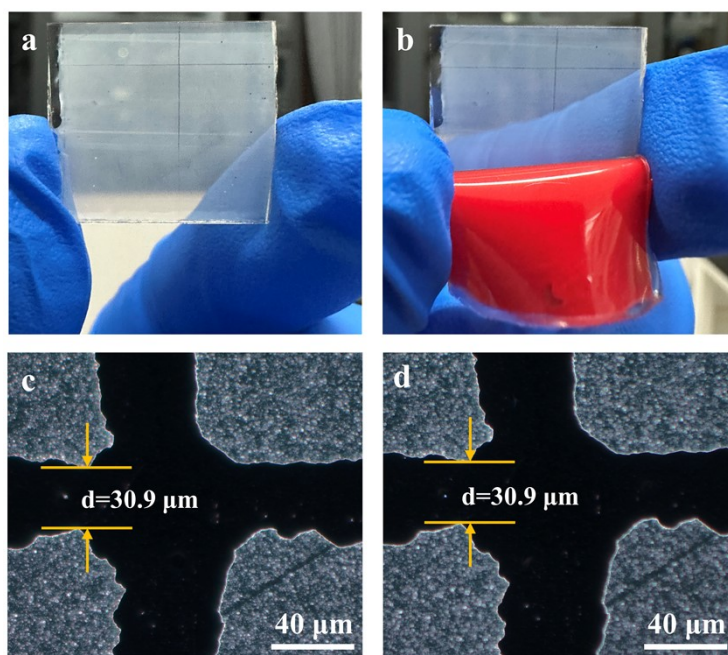

**Fig. S3.** Digital photographs of the  $\text{WO}_3 \cdot 0.33\text{H}_2\text{O}$  films before (a) and after (b) tape adhesion/peeling. Optical microscopes of the  $\text{WO}_3 \cdot 0.33\text{H}_2\text{O}$  films before (a) and after (b) tape adhesion/peeling.

The process of tape testing is described as follows: First, the cross structure of the  $\text{WO}_3 \cdot 0.33\text{H}_2\text{O}$  film was marked with a knife (bright section in Figure S2a, b). Afterward, commercial tape (3M, 4910-type) was tightly adhered to the surface of the  $\text{WO}_3 \cdot 0.33\text{H}_2\text{O}$  film for 5 minutes and then peeled off.

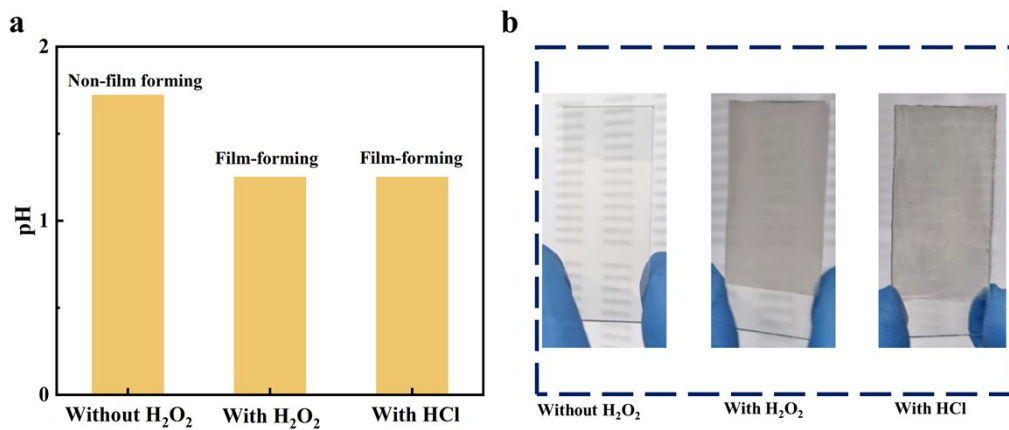

**Fig. S4.** Comparison of film formation by hydrothermal reaction under different acidic conditions : (a) pH under different acidic conditions. (b) Photo images of film formation in the presence or absence of H<sub>2</sub>O<sub>2</sub>, and in the presence of HCl, respectively.

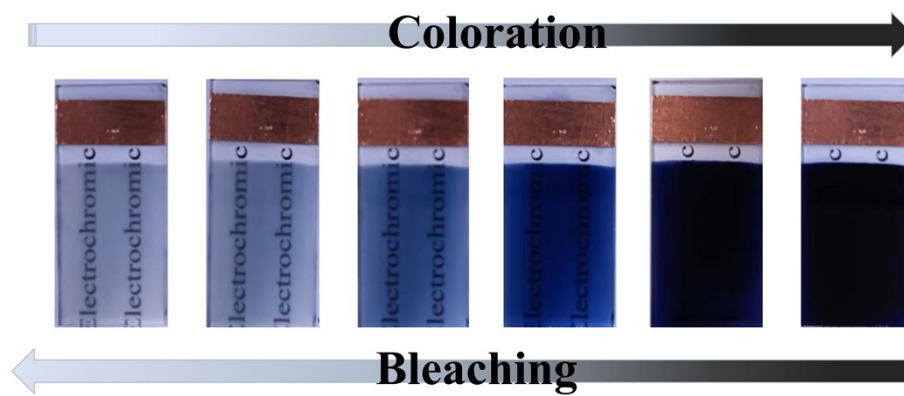

**Fig. S5.** Image of  $\text{WO}_3 \cdot 0.33\text{H}_2\text{O}$  films during the coloring and bleaching process.

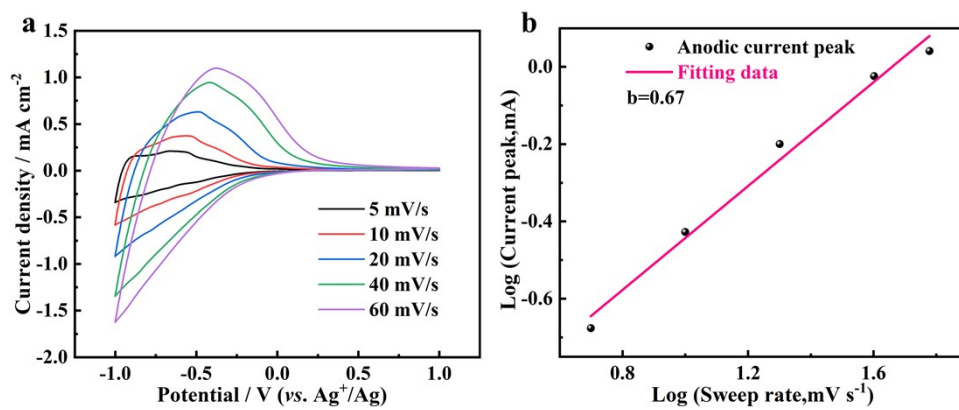

**Fig. S6.** (a) CV curves of  $\text{WO}_3 \cdot 0.33\text{H}_2\text{O}$  film at the potential region of  $\pm 1$  V at various scan rates ranging from 5 to 60  $\text{mV} \cdot \text{s}^{-1}$  (b) Calculation of b value from anodic peaks for the electrochromic  $\text{WO}_3 \cdot 0.33\text{H}_2\text{O}$  film.



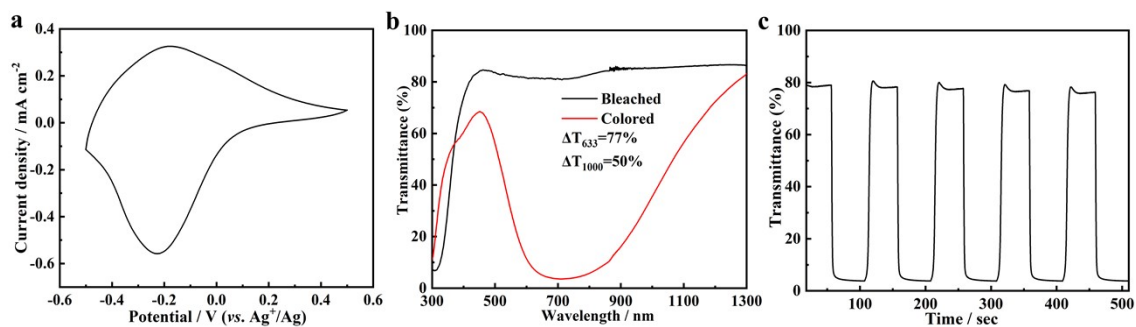

**Fig. S7.** Electrochromic and electrochemical performance of the PB film in 1 M LiClO<sub>4</sub>/PC electrolyte. (a) CV curves of the PB film at a scan rate of 20 mV s<sup>-1</sup> in the potential range from -0.5 to 0.5 V (vs Ag<sup>+</sup>/Ag). (b) Optical transmittance spectra of the PB film in the colored (0.5 V vs. Ag<sup>+</sup>/Ag, red line) and bleached (-0.5 V vs. Ag<sup>+</sup>/Ag, black line) states. (c) In situ transmittance responses of PB film in 633 nm obtained under the applied square-wave potential between -0.5 and 0.5 V for 50 s, respectively.

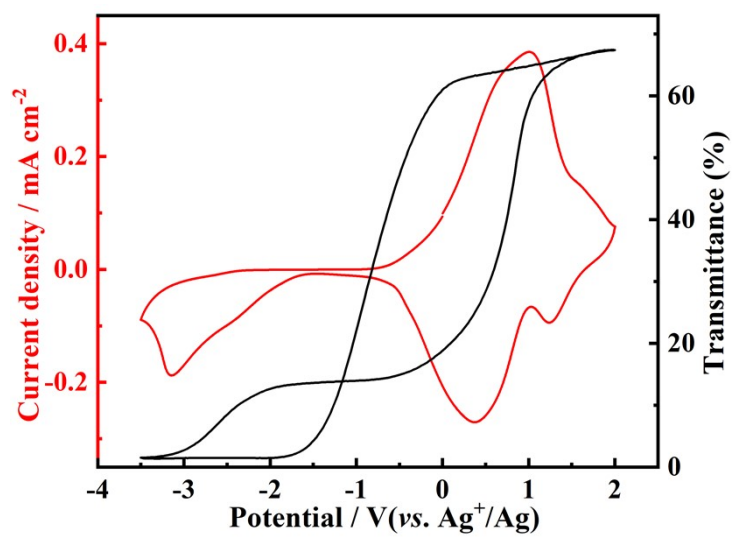

**Fig. S8.** CV curve and in situ transmittance spectrum of the EESD at 633 nm at a scan rate of 20

mV s<sup>-1</sup>.

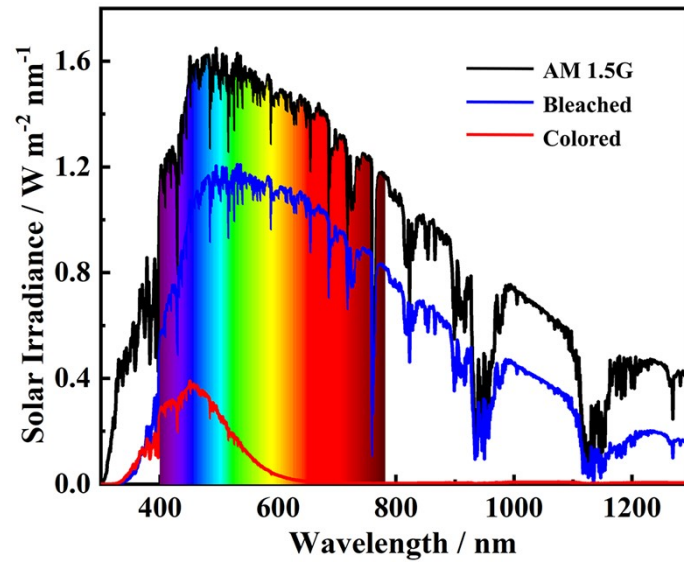

**Fig. S9.** Solar irradiance spectra of the EESD in bleached and colored states compared to the standard solar radiation curve (AM 1.5G)

**Table S1** Electrochromic performance comparisons the thin films obtained with different structural-directing agents.

| Sample                                                     | $\Delta T$ (%)/<br>$\lambda$ (nm) | Hydrothermal<br>conditions | CE<br>( $\text{cm}^2 \cdot \text{C}^{-1}$ ) | $t_b/t_c$ (s) | Cycle<br>stability (retention) |
|------------------------------------------------------------|-----------------------------------|----------------------------|---------------------------------------------|---------------|--------------------------------|
| Hexagonal<br>$\text{WO}_3^3$                               | 71.5/700                          | 120 °C , 2 h               | 72.5                                        | 10.7/12.4     | 5000<br>(90.8%)                |
| Hexagonal<br>$\text{WO}_3^4$                               | 46/1600                           | 180 °C , 4 h               | 106.1                                       | 3.6/2.4       | 1000 (96%)                     |
| Hexagonal<br>$\text{WO}_3^5$                               | 66/633                            | 180 °C , 12 h              | 106.8                                       | 3.4/6.7       | 1000 (-)                       |
| Hexagonal<br>$\text{WO}_3^6$                               | 72.4/550                          | 180 °C , 3 h               | 67.6                                        | 7/3           | 500 (67%)                      |
| Hexagonal<br>$\text{WO}_3^7$                               | 70.1/680                          | 180 °C , 2.5 h             | 55.9                                        | 3/12          | 400 (-)                        |
| Monoclinic<br>$\text{WO}_3^8$                              | 32.5/700                          | 180 °C , 2 h               | 42.37                                       | -             | 100 (95.5%)                    |
| Hexagonal<br>$\text{WO}_3^9$                               | 64/600                            | 180 °C , 4 h               | 47                                          | 17/10         | 1000 (96%)                     |
| Hexagonal<br>$\text{WO}_3^{10}$                            | 33.9/633                          | 180 °C , 24 h              | 37.6                                        | 18/25         | -                              |
| Orthorhombic<br>$\text{WO}_3^{11}$                         | 43/633                            | 180 °C , 2 h               | 112.7                                       | 1.4/4.3       | 3000 (-)                       |
| Hexagonal<br>$\text{WO}_3^{12}$                            | 78.1/630                          | 120 °C , 2.5 h             | 56.5                                        | 6/5           | 15000 (-)                      |
| Orthorhombic<br>$\text{WO}_3 \cdot 0.33\text{H}_2\text{O}$ | 80.6/633                          | 120 °C, 45 min             | 65.6                                        | 14/15         | 1000 (80%)<br>(This work)      |

1. J. W. Torsten Brezesinski, Julien Polleux, Bruce Dunn, Sarah H. Tolbert, J. Am. Chem. Soc., 2009, **131**, 1802-1809.
2. P. Yang, W. Mai, Nano Energy, 2014, **8**, 274-290.
3. Y. Wang, J. Zeng, Z. Zhou, G. Shen, T. Tang, R. U. R. Sagar and X. Qi, Appl. Surf. Sci., 2022, **573**, 151603.
4. L. Wang, Y. Liu, G. Han and H. Zhao, J. Alloy. Compd., 2022, **890**, 161833.
5. M. Dongyun, S. Guoying, W. Hongzhi, Z. Qinghong and L. Yaogang, J. Mater. Chem. A, 2012, **1**, 684.

6. Q. Huang, S. Cao, Y. Liu, Y. Liang, J. Guo, R. Zeng, J. Zhao and B. Zou, *Sol. Energy Mat. Sol. C.*, 2021, **220**, 110853.
7. L. Shen, G. Luo, J. Zheng and C. Xu, *Electrochim. Acta*, 2018, **278**, 263-270.
8. R. Yu, Z.-h. Meng, M.-d. Ye, Y.-h. Lin, N.-b. Lin, X.-y. Liu, W.-d. Yu and X.-y. Liu, *CrystEngComm*, 2015, **17**, 6583-6590.
9. F. Zheng, S. Song, F. Lu, R. Li, N. Bu, J. Liu, Y. Li, P. Hu and Q. Zhen, *CrystEngComm*, 2016, **18**, 3891-3904.
10. E. K. Jinmin Wang, Pooi See Lee,\* and Jan Ma, *J. Phys. Chem. C*, 2009, **113**, 9655–9658.
11. Z. Jiao, X. Wang, J. Wang, L. Ke, H. V. Demir, T. W. Koh and X. W. Sun, *Chem. Commun.*, 2012, **48**, 365-367.
12. J. Pan, Y. Wang, R. Zheng, M. Wang, Z. Wan, C. Jia, X. Weng, J. Xie and L. Deng, *J. Mater. Chem. A*, 2019, **7**, 13956-13967.
